# Supplementary material
Source: PubMed Central journal article supplement (PMC7057312)

## **Supplemental Material**

### **Table of Contents**

**Supplemental Table 1. All Single Nucleotide Polymorphisms (SNPs) spanning KL gene region (+/- 20 Kb).**

**Supplemental Table 2. Correlation between alpha-klotho and Creatinine clearance or eGFR at baseline.**

**Supplemental Table 3. Correlation between alpha-klotho and changes of systolic BP or diastolic BP at the end of salt infusion.**

**Supplemental Table 4. Salt-sensitive and salt-resistant patients' distribution in the discovery naïve hypertensive cohort based on KL rs9536314, rs657049 and rs9527026 genotypes.**

**Supplemental Table 5. Baseline clinical characteristics of the discovery naïve hypertensive cohort that underwent the acute saline load according to KL rs9536314 genotypes.**

**Supplemental Table 6. Baseline clinical characteristics of the replication naïve hypertensive cohort that underwent the acute saline load, and comparison with the discovery naïve hypertensive cohort.**

**Supplemental Figure 1. Salt loading test scheme.**

**Supplemental Figure 2. Flow chart for the filtering of selected SNPs in KL region.**

**Supplemental Table 1. All Single Nucleotide Polymorphisms (SNPs) spanning KL gene region (+/- 20 Kb). 32 SNPs covering the entire gene with extension to the 5' and 3' flanking regions. 17 SNPs (in normal style) are in high linkage disequilibrium ( $r^2 > 0.80$ ) with the 15 tag SNPs (in bold style).**

|    |                  | Chr 13        |         | Minor  |      |
|----|------------------|---------------|---------|--------|------|
|    | SNP rs code      | position (bp) | Alleles | allele | MAF  |
| 1  | <b>rs446647</b>  | 33571078      | T/C     | C      | 0.22 |
| 2  | <b>rs367243</b>  | 33578412      | G/A     | A      | 0.20 |
| 3  | rs499091         | 33594156      | T/C     | C      | 0.40 |
| 4  | rs211243         | 33597933      | A/G     | G      | 0.38 |
| 5  | <b>rs526906</b>  | 33598987      | C/T     | T      | 0.14 |
| 6  | rs525014         | 33599198      | C/T     | T      | 0.29 |
| 7  | rs541053         | 33606679      | G/A     | A      | 0.46 |
| 8  | <b>rs480830</b>  | 33606723      | T/C     | C      | 0.46 |
| 9  | rs9536234        | 33607814      | C/T     | T      | 0.15 |
| 10 | <b>rs9526984</b> | 33609937      | A/G     | G      | 0.09 |
| 11 | rs7982726        | 33610711      | T/C     | C      | 0.15 |
| 12 | rs569546         | 33611114      | T/C     | C      | 0.13 |
| 13 | rs8001148        | 33611365      | A/G     | G      | 0.15 |
| 14 | rs9526998        | 33613579      | G/A     | A      | 0.15 |
| 15 | <b>rs1334928</b> | 33615948      | T/G     | G      | 0.38 |
| 16 | <b>rs2320762</b> | 33617174      | T/G     | G      | 0.41 |
| 17 | rs9536282        | 33617662      | C/T     | T      | 0.15 |
| 18 | <b>rs657049</b>  | 33622817      | A/G     | G      | 0.28 |
| 19 | rs687045         | 33624889      | A/C     | C      | 0.40 |
| 20 | rs9536314        | 33628138      | T/G     | G      | 0.15 |
| 21 | <b>rs9527026</b> | 33628239      | G/A     | A      | 0.15 |
| 22 | rs522796         | 33630055      | T/C     | C      | 0.44 |
| 23 | <b>rs9315202</b> | 33642016      | C/T     | T      | 0.30 |
| 24 | rs677332         | 33643904      | A/G     | G      | 0.40 |
| 25 | <b>rs581971</b>  | 33644398      | G/A     | A      | 0.47 |
| 26 | rs582524         | 33644537      | A/G     | G      | 0.46 |
| 27 | rs598413         | 33645766      | T/G     | G      | 0.45 |
| 28 | <b>rs670657</b>  | 33649054      | G/A     | A      | 0.17 |
| 29 | <b>rs9536357</b> | 33651505      | G/A     | A      | 0.46 |
| 30 | rs9563133        | 33651873      | T/C     | C      | 0.32 |
| 31 | <b>rs9591501</b> | 33658270      | C/T     | T      | 0.09 |
| 32 | <b>rs566996</b>  | 33660785      | G/A     | A      | 0.25 |

SNPs are ranked by chromosome and position based on GRCh37 (release 105) assembly.

**Supplemental Table 2. Correlation between alpha-klotho and Creatinine clearance or eGFR at baseline.** Data are presented as unadjusted or adjusted for age, sex, BMI.

|                                   | Unadjusted |                | Adjusted |                |
|-----------------------------------|------------|----------------|----------|----------------|
|                                   | <i>R</i>   | <i>P value</i> | <i>R</i> | <i>P value</i> |
| Creatinine clearance (mL/min)     | 0.16       | 0.02           | 0.22     | <0.001         |
| eGFR (mL/min/1.73m <sup>2</sup> ) | 0.22       | 0.001          | 0.16     | 0.006          |

**Supplemental Table 3. Correlation between alpha-klotho and changes of systolic BP or diastolic BP at the end of salt infusion.** Data are presented as unadjusted or adjusted for age, sex, BMI.

|                            | Unadjusted |                | Adjusted |                |
|----------------------------|------------|----------------|----------|----------------|
|                            | <i>R</i>   | <i>p value</i> | <i>R</i> | <i>p value</i> |
| Systolic BP change (mmHg)  | -0.11      | 0.08           | -0.14    | 0.04           |
| Diastolic BP change (mmHg) | -0.14      | 0.03           | -0.14    | 0.04           |

**Supplemental Table 4. Salt-sensitive and salt-resistant patients' distribution in the discovery naïve hypertensive cohort based on KL rs9536314, rs657049 and rs9527026 genotypes.**

|              |    |        | Salt-Resistant           | Salt-Sensitive | N             |
|--------------|----|--------|--------------------------|----------------|---------------|
| KL_rs9536314 | GG | N<br>% | 6<br>37.5%               | 10<br>62.5%    | 16<br>100.0%  |
|              | GT | N<br>% | 92<br>56.4%              | 71<br>43.6%    | 163<br>100.0% |
|              | TT | N<br>% | 338<br>68.4%             | 156<br>31.6%   | 494<br>100.0% |
| Total        |    | N<br>% | 436<br>64.8%             | 237<br>35.2%   | 673<br>100.0% |
|              |    |        | $X^2 = 13.06, p = 0.001$ |                |               |
| KL_rs657049  | AA | N<br>% | 180<br>66.4%             | 91<br>33.6%    | 271<br>100.0% |
|              | AG | N<br>% | 141<br>67.5%             | 68<br>32.5%    | 209<br>100.0% |
|              | GG | N<br>% | 20<br>44.4%              | 25<br>55.6%    | 45<br>100.0%  |
| Total        |    | N<br>% | 341<br>65.0%             | 184<br>35.0%   | 525<br>100.0% |
|              |    |        | $X^2 = 9.15, p = 0.01$   |                |               |
| KL_rs9527026 | AA | N<br>% | 5<br>35.7%               | 9<br>64.3%     | 14<br>100.0%  |
|              | AG | N<br>% | 74<br>56.9%              | 56<br>43.1%    | 130<br>100.0% |
|              | GG | N<br>% | 262<br>68.8%             | 119<br>31.2%   | 381<br>100.0% |
| Total        |    | N<br>% | 341<br>65.0%             | 184<br>35.0%   | 525<br>100.0% |
|              |    |        | $X^2 = 11.38, p = 0.003$ |                |               |

KL rs9536314 refers to full discovery cohort (n=673), while rs657049 and rs9527026 refer to GWAS cohort (n=525).

**Supplemental Table 5. Baseline clinical characteristics of the discovery naïve hypertensive cohort that underwent the acute saline load according to KL rs9536314 genotypes.**

| Parameters                         | Whole NHP cohort (n=673) | TT (n=494)           | TG+GG (n=179)        | p ANOVA |
|------------------------------------|--------------------------|----------------------|----------------------|---------|
| Anthropometric                     |                          |                      |                      |         |
| Age (years)                        | 45 ± 10                  | 45 ± 10              | 45 ± 10              | 0.87    |
| Sex (F/M) <sup>a</sup>             | 126 (18.7)/547 (81.3)    | 95 (19.2)/399 (80.8) | 31 (24.6)/148 (83.4) | 0.57    |
| BMI (kg/m <sup>2</sup> )           | 25 ± 3                   | 25 ± 3               | 25 ± 2               | 0.29    |
| 24 h Ambulatory BP                 |                          |                      |                      |         |
| Systolic BP day time (mmHg)        | 142 ± 11                 | 142 ± 12             | 143 ± 11             | 0.41    |
| Diastolic BP day time (mmHg)       | 93 ± 9                   | 93 ± 9               | 93 ± 9               | 0.79    |
| Systolic BP night time (mmHg)      | 126 ± 13                 | 126 ± 13             | 126 ± 13             | 0.77    |
| Diastolic BP night time (mmHg)     | 79 ± 11                  | 79 ± 11              | 77 ± 11              | 0.17    |
| Electrolytes and kidney function   |                          |                      |                      |         |
| U. Sodium (mEq/24h)                | 142 ± 70                 | 144 ± 72             | 136 ± 63             | 0.17    |
| U. Potassium (mEq/24h)             | 60 ± 23                  | 60 ± 23              | 61 ± 23              | 0.78    |
| eGFR (ml/min/1.73 m <sup>2</sup> ) | 101 ± 13                 | 101 ± 14             | 100 ± 13             | 0.41    |
| Pl. Sodium (mEq/L)                 | 142 ± 2                  | 142 ± 2              | 142 ± 3              | 0.25    |
| Pl. Potassium (mEq/L)              | 4.0 ± 0.4                | 4.0 ± 0.3            | 4.0 ± 0.4            | 0.81    |
| RAAS and water balance             |                          |                      |                      |         |
| PRA (ng/mL/h)                      | 1.9 ± 1.8                | 2.0 ± 2.0            | 1.7 ± 1.5            | 0.11    |
| Pl. Aldo (ng/dL)                   | 171 ± 119                | 172 ± 121            | 170 ± 112            | 0.86    |
| KIotho (n=243 NHPs)                | α-KIotho (pg/mL)         | 829 ± 230            | 838 ± 203            | 0.78    |

Normally distributed numerical data expressed as mean ± SD; <sup>a</sup> Data presented as size and frequency N (%); F, Female; M, Male; NHPs, Naïve Hypertensive Patients, U., Urinary; PRA, plasma renin activity; Aldo, aldosterone.

**Supplemental Table 6. Baseline clinical characteristics of the replication naïve hypertensive cohort that underwent the acute saline load, and comparison with the discovery naïve hypertensive cohort.**

| Parameters                         | Replication NHP cohort (n=193) | Discovery NHP cohort (n=673) | p ANOVA |
|------------------------------------|--------------------------------|------------------------------|---------|
| Anthropometric                     |                                |                              |         |
| Age (years)                        | 48 ± 9                         | 45 ± 10                      | <0.001  |
| Sex (F/M) <sup>a</sup>             | 51 (26)/142 (74)               | 126 (19)/547 (81)            | 0.01    |
| BMI (kg/m <sup>2</sup> )           | 26 ± 3                         | 25 ± 3                       | <0.001  |
| 24 h Ambulatory BP                 |                                |                              |         |
| Systolic BP day time (mmHg)        | 142 ± 10                       | 142 ± 11                     | 0.91    |
| Diastolic BP day time (mmHg)       | 91 ± 8                         | 93 ± 9                       | 0.05    |
| Systolic BP night time (mmHg)      | 126 ± 13                       | 126 ± 13                     | 0.55    |
| Diastolic BP night time (mmHg)     | 76 ± 10                        | 79 ± 11                      | 0.07    |
| Electrolytes and kidney function   |                                |                              |         |
| U. Sodium (mEq/24h)                | 138 ± 64                       | 142 ± 70                     | 0.48    |
| U. Potassium (mEq/24h)             | 62 ± 23                        | 60 ± 23                      | 0.32    |
| eGFR (ml/min/1.73 m <sup>2</sup> ) | 96 ± 13                        | 101 ± 13                     | <0.001  |
| Pl. Sodium (mEq/L)                 | 142 ± 2                        | 142 ± 2                      | 0.23    |
| Pl. Potassium (mEq/L)              | 4.0 ± 0.3                      | 4.0 ± 0.4                    | 0.10    |
| RAAS and water balance             |                                |                              |         |
| PRA (ng/mL/h)                      | NA                             | 1.9 ± 1.8                    | -       |
| Pl. Aldo (ng/dL)                   | NA                             | 171 ± 119                    | -       |
| Pl. Renin (μIU/mL)                 | 8.9 ± 13                       | NA                           | -       |
| Pl. Aldo (pg/mL)                   | 127 ± 87                       | NA                           | -       |

Normally distributed numerical data expressed as mean±SD; <sup>a</sup>Data presented as size and frequency N (%); F, Female; M, Male; SR, Salt Resistant; SS, Salt-Sensitive; NHPs, Naïve Hypertensive Patients; U., Urinary; PRA, plasma renin activity; Aldo, aldosterone; NA, Not Available

**Supplemental Figure 1. Salt loading test scheme.** The saline test was performed with intravenous infusion of 2L of 0.9% saline solution (=308 mmol Na<sup>+</sup>). Monitoring of BP was every 30 min while blood/urine collection was every 120 min.

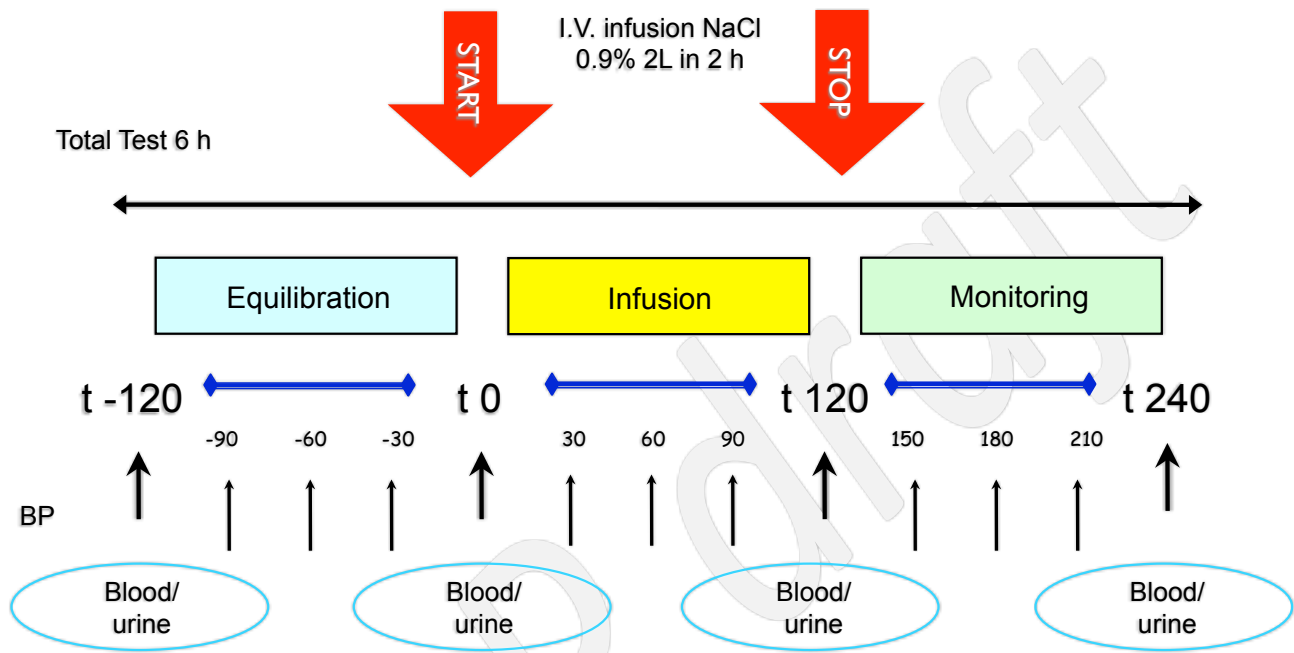

**Supplemental Figure 2. Flow chart for the filtering of selected SNPs in KL region.** NHP, naïve hypertensive patients; GWAS, genome-wide association study; PNat120, Pressure-Natriuresis at time 120.

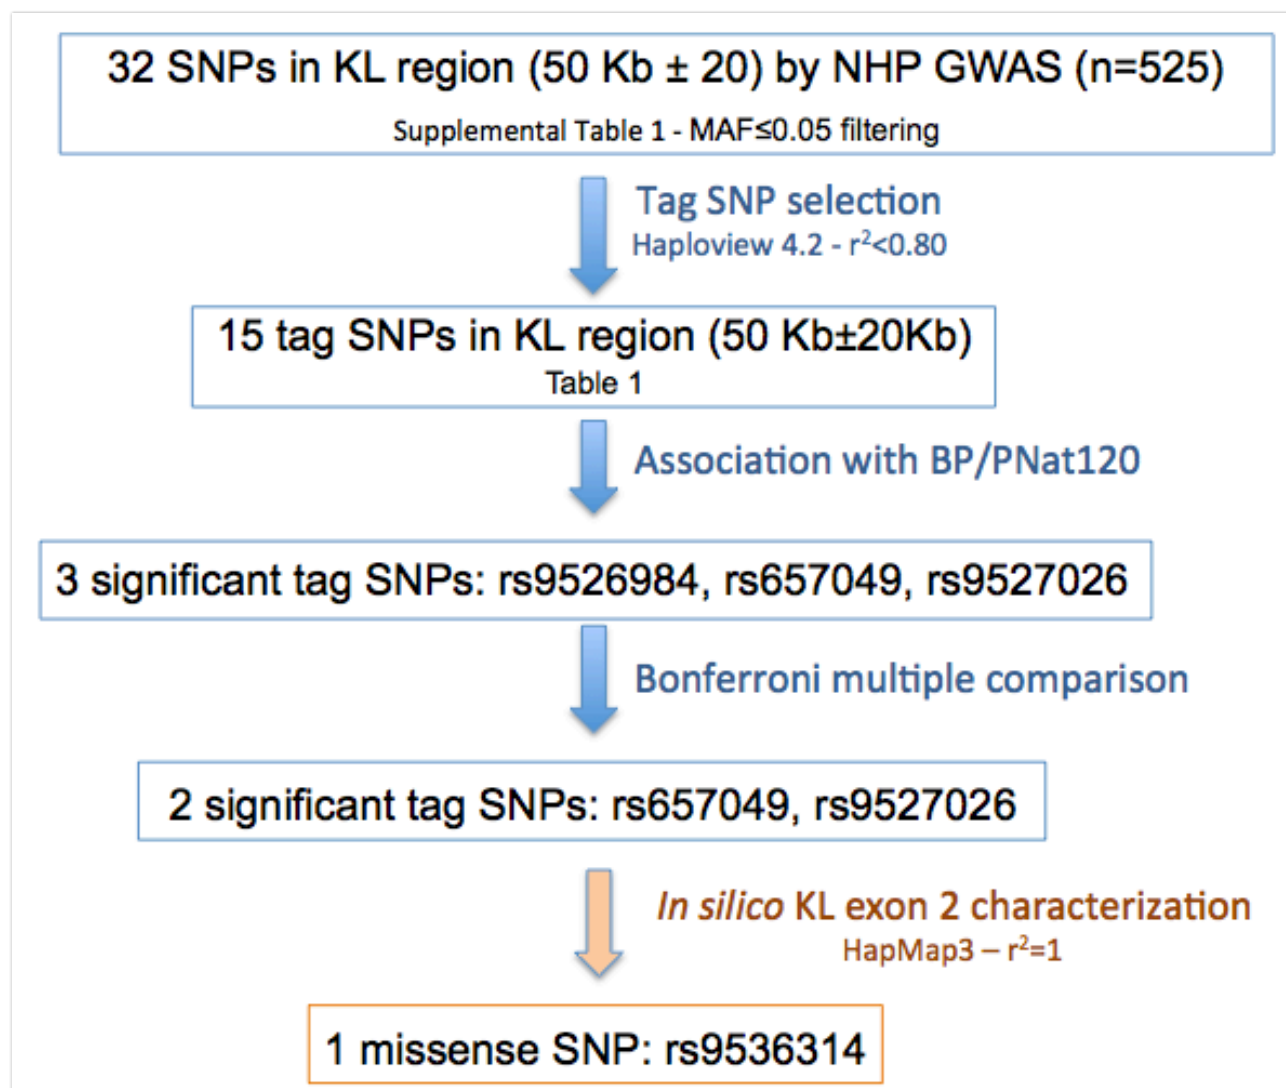

Supplement: CJN.08620719SupplementaryData.pdf [file CJN.08620719SupplementaryData.pdf]
